# Supplementary material for: The polarization of the binary system Spica, and the reflection of light from stars
Source: Springer Nature journal article supplement (doi:10.1038/s41550-019-0738-7), 2019-04-01
Supplement: 41550_2019_738_MOESM1_ESM.pdf [file 41550_2019_738_MOESM1_ESM.pdf]

In the format provided by the authors and unedited.

# Polarized reflected light from the Spica binary system

Jeremy Bailey <sup>1\*</sup>, Daniel V. Cotton <sup>1</sup>, Lucyna Kedziora-Chudczer<sup>1</sup>, Ain De Horta <sup>2</sup> and Darren Maybour<sup>2</sup>

---

<sup>1</sup>School of Physics, University of New South Wales, Sydney, New South Wales, Australia. <sup>2</sup>Western Sydney University, Penrith, New South Wales, Australia.  
\*e-mail: [j.bailey@unsw.edu.au](mailto:j.bailey@unsw.edu.au)

## Supplementary Information

### Supplementary References

1. Bailey, J., Lucas, P.W., Hough, J.H. The linear polarization of nearby bright stars measured at the parts per million level. *Mon. Not. R. Astron. Soc.* **405**, 2570-2578 (2010).
2. Serkowski, K., Mathewson, D.S. & Ford, V.L. Wavelength dependence of interstellar polarization and ratio of total to selective extinction. *Astrophys. J.* **196**, 261-290 (1975).
3. Hsu, J.-C. & Breger, M. On standard polarized stars. *Astrophys. J.* **262**, 732-738 (1982).
4. Wilking, B.A., Lebofsky, M.J., Martin, P.G., Rieke, G.H., Kemp, J.C. The wavelength dependence of interstellar linear polarization. *Astrophys. J.* **235**, 905-910 (1980).
5. Martin, P.G., Clayton, G.C. & Wolff, M.J. Ultraviolet Interstellar Linear Polarization. V. Analysis of the Final Data Set. *Astrophys. J.* **510**, 905-914 (1999).
6. McDavid, D. A search for intrinsic polarization in O stars with variable winds. *Astron. J.* **119**, 352-364 (2000).
7. Bagnulo, S. et al. Large Interstellar Polarisation Survey (LIPS). I. FORS2 spectropolarimetry in the Southern Hemisphere. *Astron. Astrophys.* **608**, A146 (2017).

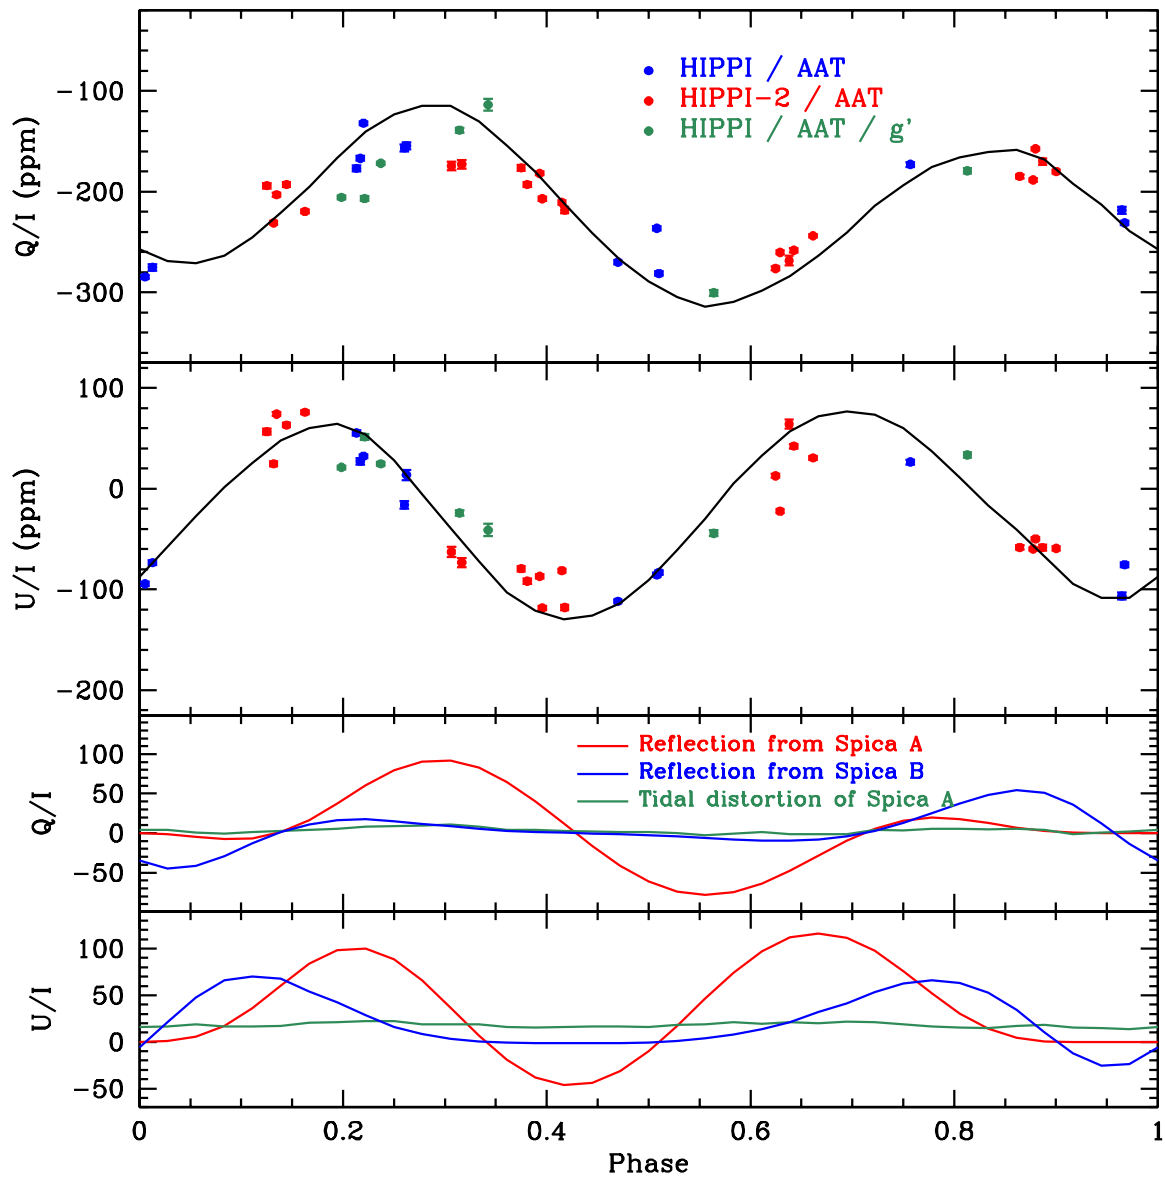

**Supplementary Figure 1 | AAT Observations.** As Fig. 1 but showing only the AAT observations which have higher precision than those on the smaller telescopes. It can be seen that the AAT observations show better agreement with the model curve.

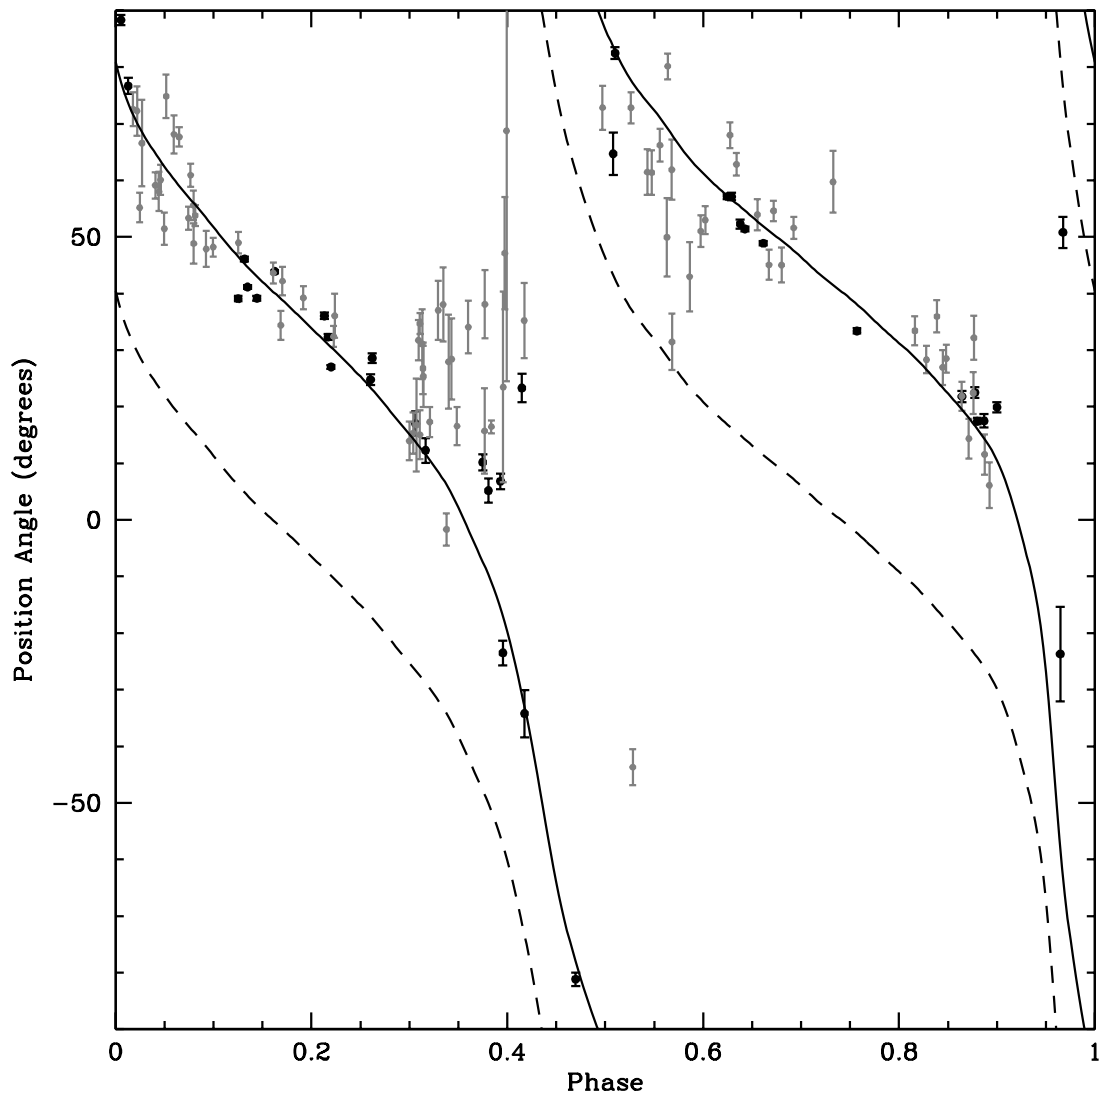

**Supplementary Figure 2 | Position Angle Variations.** The points show the observed polarization position angle of Spica after correcting for the zero point offsets listed in Table 1. Larger dots are AAT observations. Error bars are one-sigma internal standard errors derived from the statistics of the data. The position angle decreases with phase implying a clockwise sense of orbital motion. The dashed line is the modelled position angle – where the model is calculated with the line of nodes along the x-axis corresponding to  $\Omega = 90$  degrees. The solid line shows the best fit, which is obtained by rotating the model by  $+40.4$  degrees in position angle giving an actual position angle of the line of nodes of  $\Omega = 130.4$  degrees. Larger error bars and greater scatter are seen near phase 0.4 where the degree of polarization is close to zero and the position angle is not well defined.

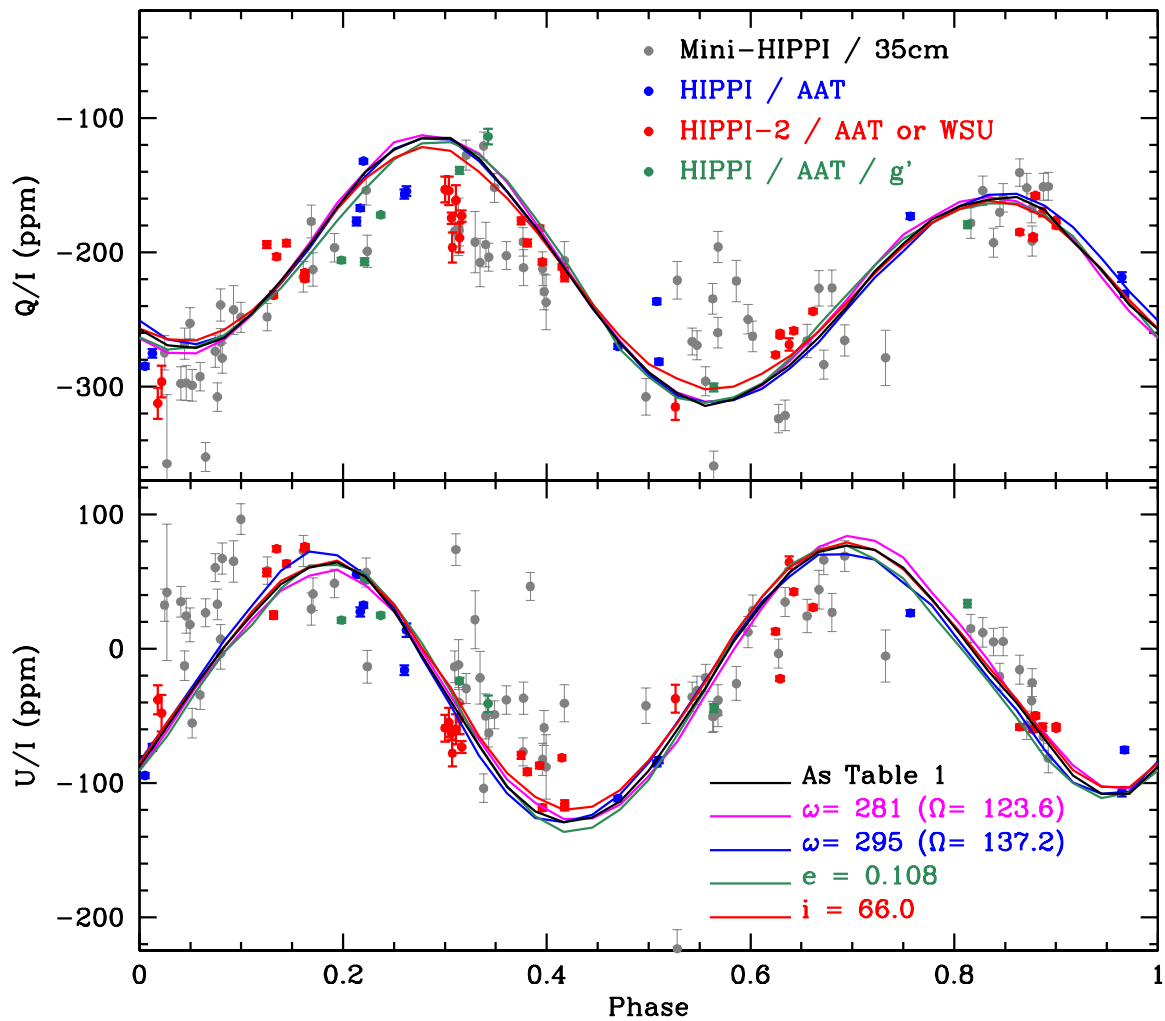

**Supplementary Figure 3 | Effect of Orbital Parameters.** The linear polarization data points are as for Fig. 1. The nominal model fit based on the parameters given in Table 1 is shown as the black line. Other curves show the result of adjusting the orbital parameters. The two values for the argument of periastron  $\omega$  are the  $\pm 7$  degree points given by the uncertainty<sup>21</sup> in the apsidal motion. These values result in a reasonable fit to the data provided the values of the polarization offsets and  $\Omega$  are redetermined. The effects of changing eccentricity and inclination to more extreme values<sup>21</sup> are also shown. Changes comparable with the spread of values in the literature do not significantly change the results.

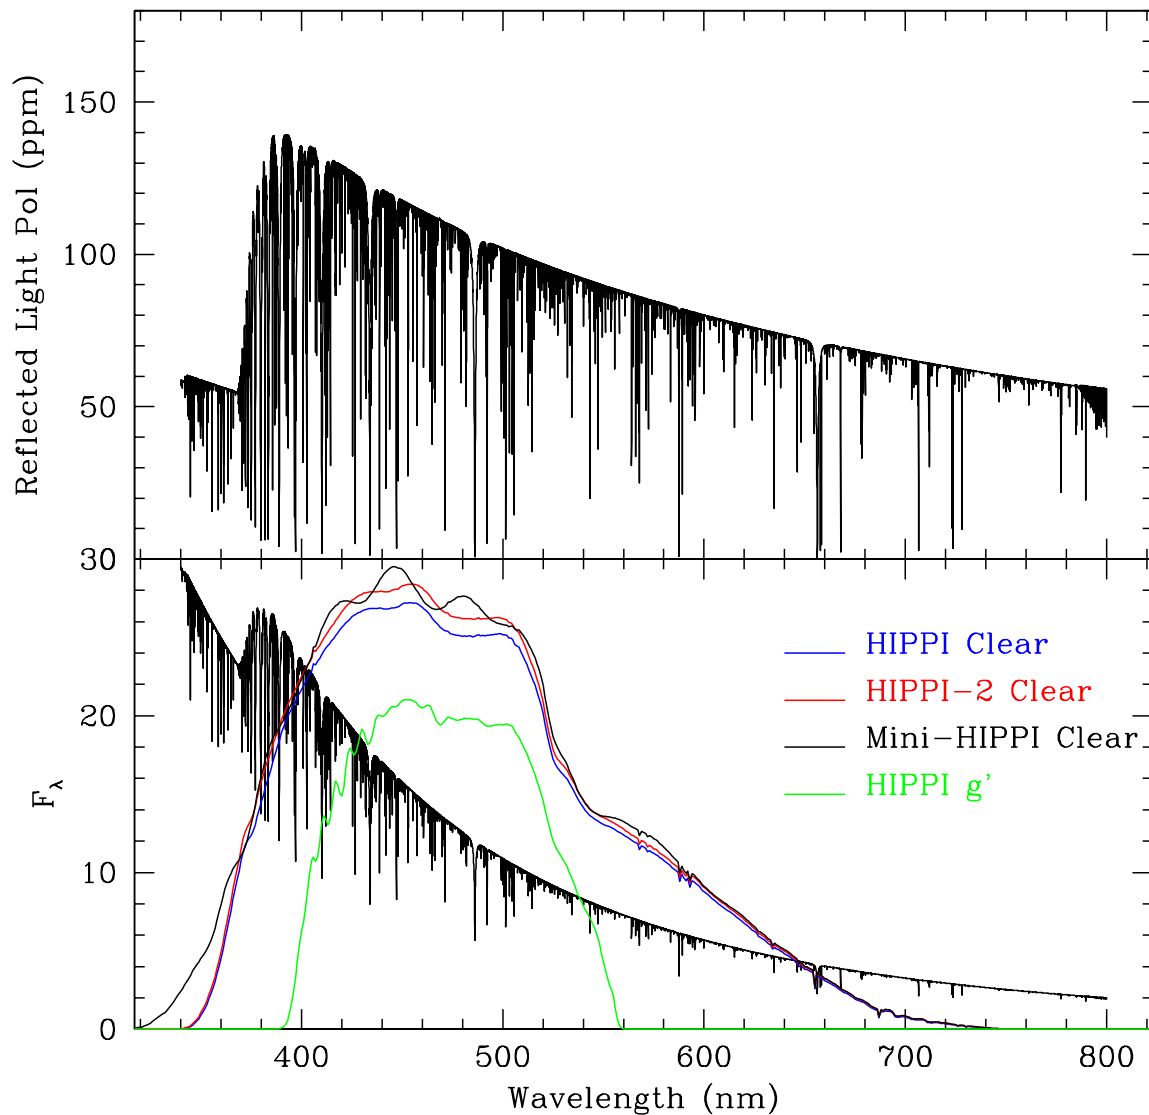

**Supplementary Figure 4 | Wavelength Dependence.** Modelled wavelength dependence of the reflected light polarization from the primary as a fraction of the total light from the system. The phase is 0.222, the same as that shown in Fig. 3. The lower panel shows the total flux for the same model, and the instrument plus atmosphere (for airmass 1) response for the various instrument/filter combinations.

**Supplementary Table 1 | Modulator Performance Characteristics.**

| Mod <sup>a</sup> | Era <sup>b</sup> | Run(s)                                           | $\lambda_0^c$ | Cd <sup>d</sup> |
|------------------|------------------|--------------------------------------------------|---------------|-----------------|
| BNS              | 1                | 2015MAY, 2015JUN                                 | 494.8         | 1.738E7         |
| BNS              | 2                | 2016FEB, 2016JUN, 2017JUN, 2017AUG               | 506.3         | 1.758E7         |
| BNS              | 3                | 2018FEBB, 2018FEBC, 2018FEBD, 2018MAR, 2018MAY   | 513.4         | 2.319E7         |
| BNS              | 4                | 2018JUL                                          | 520.6         | 2.127E7         |
| BNS              | 5                | 2018AUG (HJD: 58346.37939 – 58352.39406)         | 546.8         | 2.213E7         |
| BNS              | 6                | 2018AUG (HJD: 58357.38917)                       | 562.7         | 2.319E7         |
| BNS              | 7                | 2018AUG (HJD: 58359.37215 – 58363.36297)         | 595.4         | 1.615E7         |
| MT               |                  | M2016MAY, M2016JUN, M2016JUL, M2016OCT, M2018JAN | 505.0         | 1.750E7         |

**Notes:**

<sup>a</sup> Mod indicates either the Boulder Nonlinear Systems (BNS) or Micron Technologies (MT) modulator. Data for the MT modulator comes from ref <sup>8</sup>.

<sup>b</sup> The performance era of the BNS modulator.

<sup>c</sup> The wavelength in nm of peak modulation efficiency.

<sup>d</sup> C is a parameter describing the dispersion in birefringence of the FLC material and d is the thickness of the FLC layer; these two terms are treated as one constant (see ref <sup>8</sup>).

**Supplementary Table 2 | Telescope Polarization Measurements.**

| Run(s)             | Configuration               |                  | Adopted TP <sup>c</sup> |              | Standards Observed <sup>d</sup> |          |          |           |           |            |           |
|--------------------|-----------------------------|------------------|-------------------------|--------------|---------------------------------|----------|----------|-----------|-----------|------------|-----------|
|                    | Tel <sup>a</sup> /<br>Instr | Fil <sup>b</sup> | Q/I<br>(ppm)            | U/I<br>(ppm) | HD 2151                         | HD 10700 | HD 49815 | HD 102647 | HD 102870 | HD 128620J | HD 140573 |
| 2015MAY, 2015JUN   | AAT/<br>HIPPI               | g'               | -35.6 ± 1.3             | 4.9 ± 1.3    |                                 |          | 2        | 1         |           |            | 4         |
| 2016FEB, 2016JUN   | AAT/<br>HIPPI               | g'               | -20.4 ± 1.8             | 4.2 ± 1.9    | 2                               |          | 4        |           | 3         |            |           |
| 2017JUN, 2017AUG   | AAT/<br>HIPPI               | Cl               | -14.8 ± 1.2             | 0.9 ± 1.2    | 6                               |          | 5        | 3         | 2         |            |           |
| 2018FEBC           | AAT*/<br>HIPPI2             | Cl               | -189.8 ± 1.1            | 8.8 ± 1.0    |                                 |          | 2        | 1         |           |            |           |
| 2018FEBC, 2018FEBC | AAT*/<br>HIPPI2             | Cl               | -178.7 ± 0.8            | 14.2 ± 0.8   |                                 |          | 5        | 3         | 1         |            |           |
| 2018MAR            | AAT/<br>HIPPI2              | Cl               | 130.3 ± 0.7             | 5.2 ± 0.7    |                                 |          | 4        | 4         | 3         |            | 5         |
| 2018MAY            | WSU/<br>HIPPI2              | Cl               | -26.5 ± 2.0             | -2.8 ± 2.0   |                                 |          | 6        | 5         |           |            |           |
| 2018JUL, 2018AUG   | AAT/<br>HIPPI2              | Cl               | -9.9 ± 1.0              | 3.7 ± 0.9    | 3                               | 3        | 2        | 2         | 2         |            | 2         |
| M2016MAY           | UNSW/<br>MHIPPI             | Cl               | -93.8 ± 4.0             | -0.3 ± 4.0   |                                 |          | 4        |           |           |            |           |
| M2016JUN           | UNSW/<br>MHIPPI             | Cl               | -61.9 ± 4.1             | -7.3 ± 4.3   |                                 |          | 5        | 1         |           |            |           |
| M2016JUL, M2016OCT | UNSW/<br>MHIPPI             | Cl               | -69.4 ± 3.0             | -9.5 ± 3.0   | 4                               |          | 14       | 6         | 1         |            | 1         |
| M2018JAN           | UNSW/<br>MHIPPI             | Cl               | -58.0 ± 2.0             | 16.3 ± 2.0   |                                 |          | 9        |           |           | 3          |           |

**Notes:**

<sup>a</sup> Telescopes are: UNSW, 35 cm Schmidt Cassegrain telescope at UNSW Observatory, Sydney; WSU, Western Sydney University's 60 cm Ritchey Chretien Telescope at Penrith Observatory; AAT, 3.9 m Anglo-Australian Telescope.

<sup>b</sup> Cl denoting clear (no filter) or SDSS g' filter.

<sup>c</sup> The adopted TP is the mean of all low polarization standard observations during the run(s).

<sup>d</sup> The observed standards have been shown previously to have very low polarizations, ~5 ppm or less: HD 2151<sup>10</sup>, HD 10700<sup>26</sup>, HD 49815<sup>10</sup>, HD 102647<sup>35</sup>, HD 102870<sup>35</sup>, HD 140573<sup>35</sup>. On small telescopes we have also used HD 128620J, which has a measured polarization magnitude of ~10 ppm<sup>9</sup>, owing to its brightness.

\* Indicates AAT f/15, all other AAT observations are f/8.



**Supplementary Table 3 | PA Calibration Observations.**

| Run                  | $\Delta PA^{a,b}$<br>(degrees) | Standards Observed |          |           |           |           |           |           |           |           |
|----------------------|--------------------------------|--------------------|----------|-----------|-----------|-----------|-----------|-----------|-----------|-----------|
|                      |                                | HD 80558           | HD 84810 | HD 111613 | HD 147084 | HD 149757 | HD 154445 | HD 160529 | HD 187929 | HD 203532 |
| 2015MAY              | 0.2                            |                    |          |           | 4         |           | 1         |           |           |           |
| 2015JUN              | 0.1                            |                    |          |           | 1         |           | 1         |           |           |           |
| 2016FEB              | 0.3                            | 1                  |          |           | 1         |           |           |           |           |           |
| 2016JUN              | 0.2                            |                    |          |           | 1         |           | 1         |           |           |           |
| 2017JUN              | 1.1                            |                    |          |           | 1         |           | 1         | 1         |           |           |
| 2017AUG              | 0.5                            |                    |          |           | 1         |           | 1         |           | 1         |           |
| 2018FEBC             | –                              | 1                  |          |           |           |           |           |           |           |           |
| 2018FEBC             | 0.1                            | 2                  |          |           |           |           |           |           |           |           |
| 2018FEBC             | –                              | 1                  |          |           |           |           |           |           |           |           |
| 2018MAR              | 0.3                            | 1                  |          | 1         | 1         |           |           |           |           |           |
| 2018MAY              | 0.1                            |                    |          |           | 2         |           |           |           |           |           |
| 2018JUL <sup>c</sup> | 1.6                            |                    |          |           | 1         |           | 1         | 1         | 1         | 1*        |
| 2018AUG <sup>c</sup> | 0.9                            |                    |          |           | 3         |           |           | 3         | 5         |           |
| M2016MAY             | 0.1                            |                    | 4        |           |           |           |           |           |           |           |
| M2016JUN             | 0.4                            |                    | 2        |           | 1         |           |           |           |           |           |
| M2016JUL             | 0.4                            |                    | 1        |           | 1         |           | 1         | 1         | 1         |           |
| M2016OCT             | 0.1                            |                    | 2        |           | 1         |           |           |           |           |           |
| M2018JAN             | 0.5                            |                    |          |           | 3         | 2         |           |           |           |           |

**Notes:**

<sup>a</sup> The standard deviation in PA from multiple measurements, using  $g'$  and clear filters only.

<sup>b</sup> The position angle is calibrated against the position angles of polarized standards known from the literature: HD 80558<sup>35</sup>, HD 84810<sup>36,37</sup>, HD 111613<sup>36</sup>, HD 147084<sup>38,39</sup>, HD 149757<sup>40</sup>, HD 154445<sup>36,37,39</sup>, HD 160529<sup>36,37</sup>, HD 187929<sup>36</sup>, HD 203532<sup>41</sup>. The typical error in the literature determinations is of order a degree.

<sup>c</sup> A PA correction was applied to clear observations during these runs based on the effective wavelength ( $\lambda$ ) according to:

July 2018: For  $\lambda > 462$  nm,  $DPA = -0.00460905 \lambda^2 + 3.91925794 \lambda - 827.0236$

Aug 2018: For  $\lambda > 467$  nm,  $DPA = -0.00496338 \lambda^2 + 4.27806721 \lambda - 915.5104$

\* The standard deviation in PA determination is larger than usual for 2018JUL, this is mainly due to the measurement for HD 203532 being 2.8 degrees greater than the determined mean.

**Supplementary Table 4 | Linear Polarization Observations of Spica.**

| Modified Julian Date <sup>a</sup> | Orbital Phase | Telescope <sup>b</sup> /<br>Instrument | Run      | Fil <sup>c</sup> | $\lambda_{\text{eff}}$ <sup>d</sup><br>(nm) | Eff. <sup>e</sup> | Q/I<br>(ppm)  | U/I<br>(ppm)  |
|-----------------------------------|---------------|----------------------------------------|----------|------------------|---------------------------------------------|-------------------|---------------|---------------|
| 57166.46191                       | 0.23704       | AAT/HIPPI                              | 2015MAY  | g'               | 462                                         | 0.887             | -172.0 ± 1.8  | 24.8 ± 1.8    |
| 57202.43786                       | 0.19834       | AAT/HIPPI                              | 2015JUN  | g'               | 462                                         | 0.887             | -205.8 ± 2.0  | 21.2 ± 1.9    |
| 57202.52971                       | 0.22122       | AAT/HIPPI                              | 2015JUN  | g'               | 463                                         | 0.890             | -206.9 ± 2.6  | 51.4 ± 2.8    |
| 57445.78081                       | 0.81299       | AAT/HIPPI                              | 2016FEB  | g'               | 462                                         | 0.859             | -179.4 ± 2.7  | 33.5 ± 2.7    |
| 57447.79340                       | 0.31430       | AAT/HIPPI                              | 2016FEB  | g'               | 462                                         | 0.860             | -139.0 ± 2.4  | -24.1 ± 2.5   |
| 57448.79605                       | 0.56406       | AAT/HIPPI                              | 2016FEB  | g'               | 462                                         | 0.860             | -300.5 ± 2.9  | -44.2 ± 2.9   |
| 57564.32900                       | 0.34233       | AAT/HIPPI                              | 2016FEB  | g'               | 462                                         | 0.860             | -113.8 ± 5.7  | -41.0 ± 6.1   |
| 57525.50647                       | 0.67197       | UNSW/MHIPPI                            | M2016MAY | CI               | 451                                         | 0.741             | -283.5 ± 10.8 | 66.0 ± 10.8   |
| 57525.58860                       | 0.69242       | UNSW/MHIPPI                            | M2016MAY | CI               | 453                                         | 0.748             | -265.5 ± 11.7 | 68.9 ± 11.4   |
| 57527.50765                       | 0.17045       | UNSW/MHIPPI                            | M2016MAY | CI               | 451                                         | 0.741             | -212.8 ± 12.3 | 40.6 ± 12.3   |
| 57549.52778                       | 0.65547       | UNSW/MHIPPI                            | M2016JUN | CI               | 453                                         | 0.748             | -265.8 ± 12.4 | 24.2 ± 12.4   |
| 57549.62670                       | 0.68011       | UNSW/MHIPPI                            | M2016JUN | CI               | 465                                         | 0.794             | -226.5 ± 13.4 | 27.0 ± 14.1   |
| 57551.58819                       | 0.16870       | UNSW/MHIPPI                            | M2016JUN | CI               | 458                                         | 0.770             | -177.0 ± 12.3 | 29.5 ± 12.1   |
| 57552.45161                       | 0.38377       | UNSW/MHIPPI                            | M2016JUN | CI               | 451                                         | 0.741             | -4.1 ± 11.1   | 46.2 ± 10.3   |
| 57553.43005                       | 0.62749       | UNSW/MHIPPI                            | M2016JUN | CI               | 451                                         | 0.741             | -323.8 ± 10.7 | -3.7 ± 10.7   |
| 57533.45623                       | 0.63401       | UNSW/MHIPPI                            | M2016JUN | CI               | 451                                         | 0.741             | -321.4 ± 11.4 | 34.7 ± 10.9   |
| 57554.42968                       | 0.87649       | UNSW/MHIPPI                            | M2016JUN | CI               | 451                                         | 0.741             | -191.6 ± 11.1 | -25.4 ± 10.4  |
| 57555.42920                       | 0.12546       | UNSW/MHIPPI                            | M2016JUN | CI               | 451                                         | 0.741             | -248.1 ± 10.3 | 57.9 ± 10.2   |
| 57568.41542                       | 0.36022       | UNSW/MHIPPI                            | M2016JUL | CI               | 451                                         | 0.741             | -202.5 ± 10.4 | -38.2 ± 10.7  |
| 57568.55855                       | 0.39587       | UNSW/MHIPPI                            | M2016JUL | CI               | 461                                         | 0.781             | -212.1 ± 12.5 | -82.5 ± 12.1  |
| 57570.43872                       | 0.86420       | UNSW/MHIPPI                            | M2016JUL | CI               | 452                                         | 0.745             | -140.6 ± 10.3 | -15.7 ± 10.8  |
| 57583.39922                       | 0.09256       | UNSW/MHIPPI                            | M2016JUL | CI               | 452                                         | 0.745             | -242.8 ± 18.2 | 65.0 ± 15.4   |
| 57586.43275                       | 0.84818       | UNSW/MHIPPI                            | M2016JUL | CI               | 453                                         | 0.751             | -159.5 ± 10.6 | 5.3 ± 10.5    |
| 57592.37949                       | 0.32947       | UNSW/MHIPPI                            | M2016JUL | CI               | 452                                         | 0.745             | -192.3 ± 22.9 | 21.6 ± 21.5   |
| 57592.39991                       | 0.33455       | UNSW/MHIPPI                            | M2016JUL | CI               | 453                                         | 0.748             | -207.6 ± 17.9 | -21.7 ± 19.5  |
| 57592.42179                       | 0.34000       | UNSW/MHIPPI                            | M2016JUL | CI               | 453                                         | 0.751             | -221.3 ± 15.5 | -26.0 ± 12.6  |
| 57594.38092                       | 0.82800       | UNSW/MHIPPI                            | M2016JUL | CI               | 452                                         | 0.745             | -154.1 ± 11.1 | 11.9 ± 11.0   |
| 57595.37046                       | 0.07449       | UNSW/MHIPPI                            | M2016JUL | CI               | 452                                         | 0.745             | -273.7 ± 12.0 | 60.3 ± 10.4   |
| 57595.39123                       | 0.07966       | UNSW/MHIPPI                            | M2016JUL | CI               | 453                                         | 0.748             | -267.0 ± 10.1 | 7.0 ± 10.7    |
| 57608.37321                       | 0.31336       | UNSW/MHIPPI                            | M2016JUL | CI               | 453                                         | 0.751             | -181.0 ± 21.5 | -12.0 ± 18.6  |
| 57611.39051                       | 0.06495       | UNSW/MHIPPI                            | M2016JUL | CI               | 455                                         | 0.758             | -352.3 ± 10.9 | 26.7 ± 10.3   |
| 57613.36112                       | 0.55581       | UNSW/MHIPPI                            | M2016JUL | CI               | 453                                         | 0.751             | -295.9 ± 10.7 | -21.7 ± 10.2  |
| 57614.40666                       | 0.81624       | UNSW/MHIPPI                            | M2016JUL | CI               | 458                                         | 0.770             | -178.2 ± 11.2 | 14.9 ± 10.5   |
| 57615.38367                       | 0.05961       | UNSW/MHIPPI                            | M2016JUL | CI               | 456                                         | 0.761             | -292.5 ± 10.5 | -34.5 ± 10.9  |
| 57616.39161                       | 0.31068       | UNSW/MHIPPI                            | M2016JUL | CI               | 457                                         | 0.764             | -161.8 ± 11.9 | 73.7 ± 11.8   |
| 57627.36589                       | 0.04428       | UNSW/MHIPPI                            | M2016JUL | CI               | 457                                         | 0.767             | -268.0 ± 11.6 | -12.8 ± 11.0  |
| 57627.38814                       | 0.04982       | UNSW/MHIPPI                            | M2016JUL | CI               | 461                                         | 0.778             | -252.9 ± 11.6 | 17.9 ± 12.6   |
| 57631.36631                       | 0.04075       | UNSW/MHIPPI                            | M2016JUL | CI               | 459                                         | 0.773             | -297.7 ± 12.4 | 34.9 ± 11.5   |
| 57631.38739                       | 0.04600       | UNSW/MHIPPI                            | M2016JUL | CI               | 463                                         | 0.786             | -297.3 ± 13.1 | 24.4 ± 13.0   |
| 57647.36959                       | 0.02703       | UNSW/MHIPPI                            | M2016JUL | CI               | 474                                         | 0.821             | -357.3 ± 51.2 | 41.9 ± 50.9   |
| 57745.73181                       | 0.52822       | UNSW/MHIPPI                            | M2016OCT | CI               | 456                                         | 0.761             | -220.7 ± 14.0 | -223.4 ± 14.3 |
| 57747.72490                       | 0.02468       | UNSW/MHIPPI                            | M2016OCT | CI               | 456                                         | 0.761             | -274.7 ± 12.8 | 32.4 ± 12.1   |
| 57769.69524                       | 0.49730       | UNSW/MHIPPI                            | M2016OCT | CI               | 453                                         | 0.751             | -307.6 ± 13.7 | -42.4 ± 13.2  |
| 57780.64131                       | 0.22387       | UNSW/MHIPPI                            | M2016OCT | CI               | 456                                         | 0.761             | -199.2 ± 12.0 | -13.4 ± 12.3  |
| 57788.66614                       | 0.22279       | UNSW/MHIPPI                            | M2016OCT | CI               | 453                                         | 0.748             | -153.8 ± 11.1 | 56.7 ± 10.6   |
| 57804.59949                       | 0.19165       | UNSW/MHIPPI                            | M2016OCT | CI               | 454                                         | 0.754             | -196.5 ± 10.6 | 48.6 ± 10.6   |
| 57853.51894                       | 0.37707       | UNSW/MHIPPI                            | M2016OCT | CI               | 452                                         | 0.745             | -211.4 ± 13.3 | -36.8 ± 12.1  |
| 57857.53274                       | 0.37687       | UNSW/MHIPPI                            | M2016OCT | CI               | 451                                         | 0.741             | -192.2 ± 10.6 | -76.9 ± 10.5  |
| 57871.43060                       | 0.83871       | UNSW/MHIPPI                            | M2016OCT | CI               | 453                                         | 0.751             | -192.8 ± 10.8 | 5.0 ± 10.3    |

|             |         |             |          |    |     |       |               |               |
|-------------|---------|-------------|----------|----|-----|-------|---------------|---------------|
| 57871.45456 | 0.84468 | UNSW/MHIPPI | M2016OCT | CI | 453 | 0.748 | -170.2 ± 10.4 | -20.8 ± 10.1  |
| 57871.62367 | 0.88747 | UNSW/MHIPPI | M2016OCT | CI | 452 | 0.745 | -151.3 ± 10.1 | -65.7 ± 10.1  |
| 57871.64560 | 0.89227 | UNSW/MHIPPI | M2016OCT | CI | 453 | 0.748 | -151.0 ± 10.4 | -81.5 ± 10.9  |
| 57873.43497 | 0.33798 | UNSW/MHIPPI | M2016OCT | CI | 453 | 0.748 | -120.8 ± 10.3 | -104.0 ± 10.6 |
| 57873.45557 | 0.34311 | UNSW/MHIPPI | M2016OCT | CI | 452 | 0.745 | -203.5 ± 10.4 | -62.8 ± 10.6  |
| 57873.47763 | 0.34861 | UNSW/MHIPPI | M2016OCT | CI | 452 | 0.745 | -151.8 ± 10.8 | -49.1 ± 10.4  |
| 57878.35289 | 0.56299 | UNSW/MHIPPI | M2016OCT | CI | 458 | 0.770 | -234.6 ± 11.5 | -50.7 ± 11.6  |
| 57878.37269 | 0.56793 | UNSW/MHIPPI | M2016OCT | CI | 456 | 0.761 | -259.8 ± 11.5 | -47.8 ± 10.3  |
| 57880.41484 | 0.07661 | UNSW/MHIPPI | M2016OCT | CI | 453 | 0.748 | -307.6 ± 10.6 | 33.0 ± 11.5   |
| 57880.43407 | 0.08140 | UNSW/MHIPPI | M2016OCT | CI | 452 | 0.745 | -278.7 ± 11.1 | 67.1 ± 11.4   |
| 57881.34954 | 0.30943 | UNSW/MHIPPI | M2016OCT | CI | 457 | 0.767 | -184.3 ± 11.7 | -13.5 ± 11.9  |
| 57881.36751 | 0.31391 | UNSW/MHIPPI | M2016OCT | CI | 456 | 0.761 | -183.7 ± 11.5 | -40.0 ± 11.0  |
| 57881.39578 | 0.32095 | UNSW/MHIPPI | M2016OCT | CI | 453 | 0.751 | -127.7 ± 11.1 | -29.7 ± 11.2  |
| 57883.60520 | 0.87130 | UNSW/MHIPPI | M2016OCT | CI | 453 | 0.748 | -151.9 ± 10.6 | -57.0 ± 10.5  |
| 57883.62388 | 0.87595 | UNSW/MHIPPI | M2016OCT | CI | 453 | 0.751 | -167.1 ± 10.7 | -38.9 ± 10.9  |
| 57888.45664 | 0.07975 | UNSW/MHIPPI | M2016OCT | CI | 451 | 0.741 | -239.1 ± 11.9 | -3.6 ± 11.5   |
| 57888.53652 | 0.09965 | UNSW/MHIPPI | M2016OCT | CI | 451 | 0.741 | -248.3 ± 11.3 | 96.3 ± 11.4   |
| 57894.41463 | 0.56384 | UNSW/MHIPPI | M2016OCT | CI | 452 | 0.745 | -359.0 ± 11.2 | -50.4 ± 11.2  |
| 57894.43238 | 0.56826 | UNSW/MHIPPI | M2016OCT | CI | 451 | 0.741 | -196.0 ± 11.6 | -38.4 ± 11.4  |
| 57896.37331 | 0.05173 | UNSW/MHIPPI | M2016OCT | CI | 453 | 0.748 | -299.0 ± 11.7 | -55.4 ± 11.1  |
| 57898.34524 | 0.54292 | UNSW/MHIPPI | M2016OCT | CI | 454 | 0.754 | -266.5 ± 10.0 | -35.9 ± 11.0  |
| 57898.36339 | 0.54744 | UNSW/MHIPPI | M2016OCT | CI | 453 | 0.748 | -269.2 ± 10.9 | -31.2 ± 10.6  |
| 57898.56452 | 0.59754 | UNSW/MHIPPI | M2016OCT | CI | 453 | 0.748 | -249.9 ± 11.0 | 12.3 ± 11.6   |
| 57898.58278 | 0.60209 | UNSW/MHIPPI | M2016OCT | CI | 453 | 0.751 | -262.5 ± 11.4 | 28.3 ± 11.7   |
| 57928.33420 | 0.01291 | AAT/HIPPI   | 2017JUN  | CI | 454 | 0.754 | -275.2 ± 3.1  | -73.3 ± 2.6   |
| 57929.33512 | 0.26223 | AAT/HIPPI   | 2017JUN  | CI | 454 | 0.754 | -145.4 ± 3.6  | 13.7 ± 5.0    |
| 57930.33052 | 0.51020 | AAT/HIPPI   | 2017JUN  | CI | 454 | 0.754 | -281.4 ± 2.2  | -83.0 ± 2.1   |
| 57933.34190 | 0.26029 | AAT/HIPPI   | 2017JUN  | CI | 454 | 0.754 | -156.7 ± 3.5  | -16.0 ± 3.6   |
| 57934.33678 | 0.50810 | AAT/HIPPI   | 2017JUN  | CI | 454 | 0.754 | -236.5 ± 2.1  | -85.5 ± 2.1   |
| 57935.33618 | 0.75704 | AAT/HIPPI   | 2017JUN  | CI | 454 | 0.754 | -173.1 ± 2.3  | 26.5 ± 2.3    |
| 57936.33393 | 0.00558 | AAT/HIPPI   | 2017JUN  | CI | 454 | 0.754 | -284.7 ± 1.9  | -94.4 ± 1.9   |
| 57977.34096 | 0.22007 | AAT/HIPPI   | 2017AUG  | CI | 455 | 0.757 | -132.1 ± 1.9  | 32.3 ± 2.0    |
| 57978.34354 | 0.46981 | AAT/HIPPI   | 2017AUG  | CI | 455 | 0.759 | -270.0 ± 2.0  | -111.7 ± 1.9  |
| 57980.34119 | 0.96741 | AAT/HIPPI   | 2017AUG  | CI | 455 | 0.759 | -231.0 ± 2.2  | -75.4 ± 2.3   |
| 57981.34299 | 0.21695 | AAT/HIPPI   | 2017AUG  | CI | 455 | 0.759 | -167.0 ± 2.3  | 27.3 ± 3.3    |
| 57984.34479 | 0.96467 | AAT/HIPPI   | 2017AUG  | CI | 456 | 0.761 | -218.4 ± 3.5  | -106.5 ± 3.4  |
| 57985.34279 | 0.21326 | AAT/HIPPI   | 2017AUG  | CI | 456 | 0.761 | -177.0 ± 3.1  | 55.3 ± 2.8    |
| 58152.69840 | 0.90011 | AAT*/HIPPI2 | 2018FEBB | CI | 454 | 0.686 | -180.1 ± 2.0  | -59.2 ± 1.9   |
| 58153.75202 | 0.16256 | AAT*/HIPPI2 | 2018FEBD | CI | 453 | 0.683 | -219.7 ± 1.8  | 75.9 ± 1.8    |
| 58154.77591 | 0.41760 | AAT*/HIPPI2 | 2018FEBD | CI | 453 | 0.683 | -218.5 ± 3.2  | -117.8 ± 2.6  |
| 58200.79225 | 0.87988 | AAT/HIPPI2  | 2018MAR  | CI | 462 | 0.726 | -157.6 ± 1.7  | -49.8 ± 1.6   |
| 58201.80348 | 0.13177 | AAT/HIPPI2  | 2018MAR  | CI | 463 | 0.731 | -231.0 ± 1.8  | 24.8 ± 2.5    |
| 58203.79980 | 0.62904 | AAT/HIPPI2  | 2018MAR  | CI | 463 | 0.731 | -260.4 ± 1.9  | -22.3 ± 1.8   |
| 58204.79716 | 0.87747 | AAT/HIPPI2  | 2018MAR  | CI | 463 | 0.731 | -188.4 ± 1.8  | -59.8 ± 1.7   |
| 58207.79703 | 0.62471 | AAT/HIPPI2  | 2018MAR  | CI | 463 | 0.733 | -276.3 ± 1.8  | 12.8 ± 1.9    |
| 58210.53357 | 0.30636 | AAT/HIPPI2  | 2018MAR  | CI | 459 | 0.717 | -176.4 ± 4.2  | -62.7 ± 4.9   |
| 58210.57468 | 0.31660 | AAT/HIPPI2  | 2018MAR  | CI | 459 | 0.714 | -172.8 ± 4.2  | -73.3 ± 4.5   |
| 58212.77341 | 0.86429 | AAT/HIPPI2  | 2018MAR  | CI | 463 | 0.731 | -184.9 ± 1.9  | -58.3 ± 2.0   |
| 58242.62498 | 0.30006 | WSU/HIPPI2  | 2018MAY  | CI | 461 | 0.723 | -153.2 ± 9.6  | -59.1 ± 10.0  |
| 58242.64011 | 0.30383 | WSU/HIPPI2  | 2018MAY  | CI | 461 | 0.725 | -154.1 ± 10.5 | -54.9 ± 10.9  |
| 58242.65395 | 0.30727 | WSU/HIPPI2  | 2018MAY  | CI | 462 | 0.728 | -196.4 ± 11.1 | -77.9 ± 8.9   |
| 58242.66768 | 0.31069 | WSU/HIPPI2  | 2018MAY  | CI | 463 | 0.731 | -161.2 ± 11.2 | -60.0 ± 11.3  |
| 58242.68237 | 0.31435 | WSU/HIPPI2  | 2018MAY  | CI | 463 | 0.733 | -189.2 ± 10.9 | -52.3 ± 11.3  |
| 58247.54748 | 0.52621 | WSU/HIPPI2  | 2018MAY  | CI | 460 | 0.717 | -315.0 ± 9.8  | -37.3 ± 10.4  |
| 58249.52182 | 0.01800 | WSU/HIPPI2  | 2018MAY  | CI | 460 | 0.717 | -312.4 ± 11.7 | -38.0 ± 10.7  |
| 58249.53773 | 0.02196 | WSU/HIPPI2  | 2018MAY  | CI | 460 | 0.717 | -296.3 ± 11.8 | -48.0 ± 13.7  |
| 58284.50760 | 0.73266 | UNSW/MHIPPI | M2018JAN | CI | 453 | 0.748 | -278.5 ± 20.5 | -5.5 ± 19.3   |

|             |         |             |          |    |     |       |               |              |
|-------------|---------|-------------|----------|----|-----|-------|---------------|--------------|
| 58311.33394 | 0.41487 | AAT/HIPPI2  | 2018JUL  | CI | 459 | 0.703 | -210.8 ± 2.1  | -81.3 ± 1.9  |
| 58316.33830 | 0.66142 | AAT/HIPPI2  | 2018JUL  | CI | 459 | 0.703 | -243.9 ± 1.8  | 30.6 ± 1.9   |
| 58328.40509 | 0.66715 | UNSW/MHIPPI | M2018JAN | CI | 453 | 0.751 | -226.7 ± 13.2 | 43.9 ± 14.3  |
| 58334.40236 | 0.16102 | UNSW/MHIPPI | M2018JAN | CI | 454 | 0.754 | -218.2 ± 11.3 | 72.7 ± 11.7  |
| 58335.35876 | 0.39925 | UNSW/MHIPPI | M2018JAN | CI | 453 | 0.748 | -237.1 ± 20.4 | -88.0 ± 24.0 |
| 58335.43132 | 0.41732 | UNSW/MHIPPI | M2018JAN | CI | 457 | 0.767 | -206.1 ± 14.0 | -40.7 ± 13.9 |
| 58343.38059 | 0.39742 | UNSW/MHIPPI | M2018JAN | CI | 455 | 0.758 | -229.3 ± 13.5 | -58.9 ± 13.0 |
| 58346.37939 | 0.14439 | AAT/HIPPI2  | 2018AUG  | CI | 462 | 0.626 | -193.0 ± 2.4  | 63.2 ± 2.1   |
| 58347.38759 | 0.39553 | AAT/HIPPI2  | 2018AUG  | CI | 462 | 0.629 | -207.1 ± 2.0  | -118.5 ± 2.3 |
| 58348.36094 | 0.63798 | AAT/HIPPI2  | 2018AUG  | CI | 461 | 0.620 | -268.6 ± 4.7  | 64.2 ± 4.6   |
| 58350.35545 | 0.13480 | AAT/HIPPI2  | 2018AUG  | CI | 461 | 0.620 | -203.1 ± 2.0  | 74.2 ± 1.9   |
| 58351.39224 | 0.39305 | AAT/HIPPI2  | 2018AUG  | CI | 463 | 0.635 | -182.0 ± 1.9  | -87.0 ± 2.2  |
| 58352.39406 | 0.64260 | AAT/HIPPI2  | 2018AUG  | CI | 464 | 0.638 | -258.4 ± 2.1  | 42.3 ± 2.1   |
| 58357.38917 | 0.88684 | AAT/HIPPI2  | 2018AUG  | CI | 465 | 0.582 | -170.1 ± 3.2  | -58.4 ± 2.7  |
| 58359.37215 | 0.38078 | AAT/HIPPI2  | 2018AUG  | CI | 463 | 0.535 | -193.0 ± 2.5  | -91.7 ± 2.5  |
| 58362.36071 | 0.12520 | AAT/HIPPI2  | 2018AUG  | CI | 463 | 0.535 | -194.1 ± 2.7  | 56.7 ± 2.7   |
| 58363.36297 | 0.37486 | AAT/HIPPI2  | 2018AUG  | CI | 464 | 0.538 | -176.5 ± 2.7  | -79.3 ± 2.6  |

**Notes:**

<sup>a</sup> Heliocentric modified Julian Date (= JD – 2400000.5) of mid point of observation.

<sup>b</sup> Telescopes are: UNSW, 35 cm Schmidt Cassegrain telescope at UNSW Observatory, Sydney; WSU, Western Sydney University's 60 cm Ritchey Chretien Telescope at Penrith Observatory; AAT, 3.9 m Anglo-Australian Telescope.

<sup>c</sup> CI denoting clear (no filter) or SDSS g' filter.

<sup>d</sup> The effective wavelength of the observation in nm.

<sup>e</sup> The efficiency correction – the raw value is divided by this number to give the tabulated values.

\* Indicates AAT f/15, all other AAT observations are f/8.
